# Supplementary material for: ArfX2 GTPase Regulates Trafficking From the Trans-Golgi to Lysosomes and Is Necessary for Liver Abscess Formation in the Protozoan Parasite Entamoeba histolytica
Source: Front Cell Infect Microbiol. 2021 Dec 17;11:794152. doi: 10.3389/fcimb.2021.794152 (PMC8719317; doi:10.3389/fcimb.2021.794152)
Supplement: Supplementary file 11 [file Table_3.xlsx]

## Sheet: Sheet1
Table S3. Overall amino acid identities between E. histolytica and human Sar/ Arf families of GTPases
	EhArfX1a	EhArfX1b	EhArfX2	EhArfX3	EhArfX4	EhArfX5	EhArfX6	EhArfX7	EhArfX8	EhArfX9	EhArfX10	HsArf1	EhSar1a	EhSar1b	EhSar1c	HsSar1
EhArfX1a-EHI_137720	100	100	68	48	52	49	46	41	35	34	24	76	34	34	33	28
EhArfX1b-EHI_073470		100	68	48	52	49	46	41	35	34	24	76	34	34	33	28
EhArfX2-EHI_189960			100	47	49	47	47	38	35	30	25	68	34	34	37	31
EhArfX3-EHI_073480				100	35	38	31	36	32	30	21	48	25	25	25	22
EhArfX4-EHI_121870					100	42	40	33	30	30	24	52	35	35	35	32
EhArfX5-EHI_092730						100	52	37	34	27	23	49	35	35	34	27
EhArfX6-EHI_053050							100	34	31	27	21	46	33	33	33	30
EhArfX7-EHI_194500								100	80	48	22	41	30	30	30	29
EhArfX8-EHI_073440									100	47	23	35	29	29	28	26
EhArfX9-EHI_134840										100	18	33	29	29	28	27
EhArfX10-EHI_107150											100	27	18	18	18	18
HsArf1												100	34	34	33	28
EhSar1a-EHI_075210													100	100	99	55
EhSar1b-EHI_031410														100	99	55
EhSar1c-EHI_075040															100	55
HsSar1																100
